# Supplementary material for: Estrogen-related receptor alpha (ERRα) is a key regulator of intestinal homeostasis and protects against colitis
Source: PubMed Central journal article supplement (PMC8302669; doi:10.1038/s41598-021-94499-5), 2021-07-23
Supplement: 41598_2021_94499_MOESM2_ESM.pdf [file 41598_2021_94499_MOESM2_ESM.pdf]

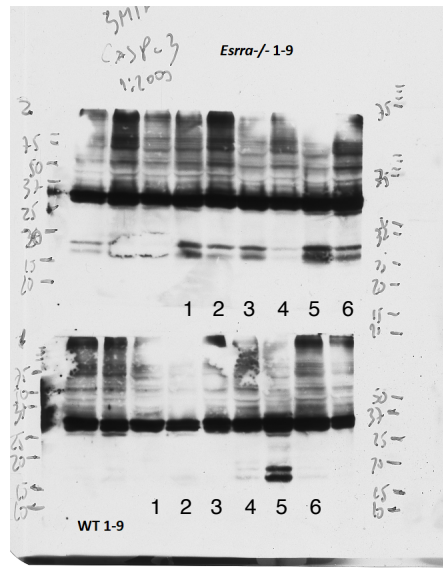

Caspase-3

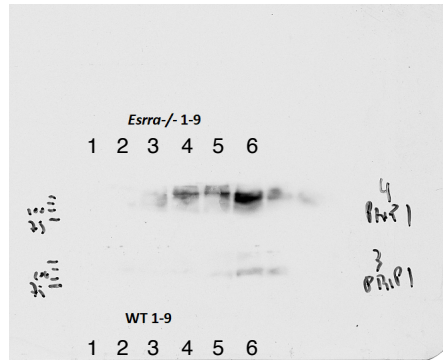

pRIPK1

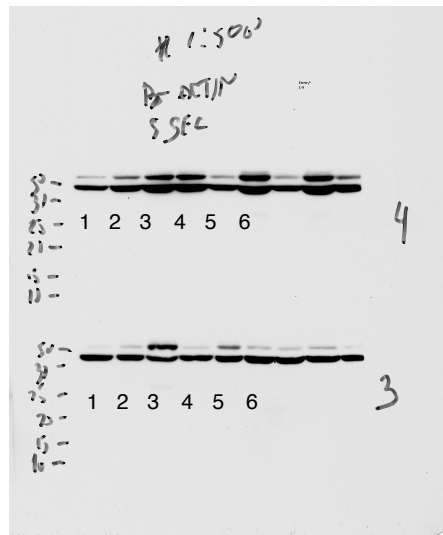

β-actin  
(of the pRIPK1 blots)
